# Supplementary material
Source: HighWire-hosted journal article supplement (https://hw-f5-jim.highwire.org/content/65/4/772)
Supplement: inline-supplementary-material-1 [file inline-supplementary-material-1.pdf]

## Supplementary Figure

Flow chart for participant enrollment.

### Supplementary Figure.

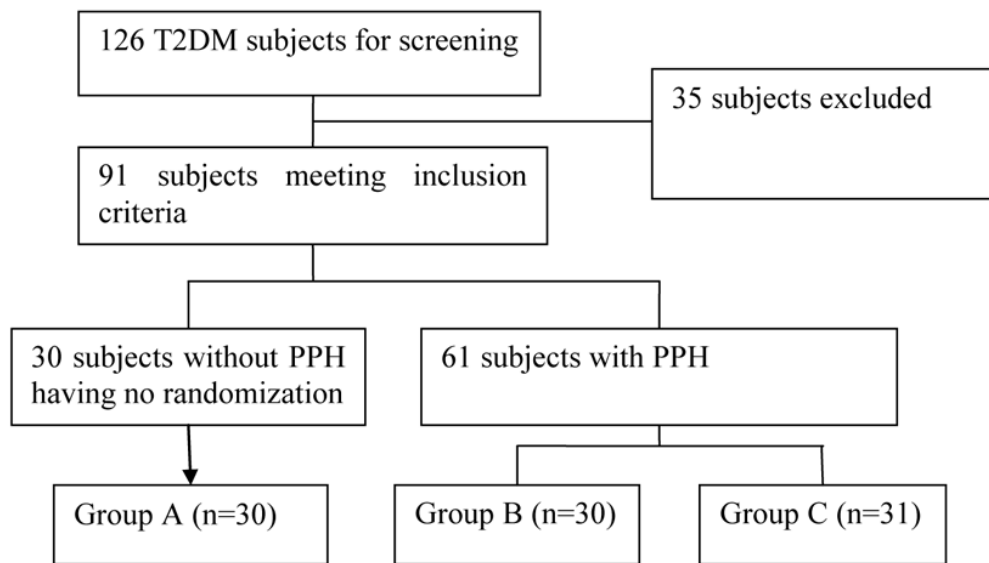



|                   |                  |                  |                  |                  |                |               |                |                |                |
|-------------------|------------------|------------------|------------------|------------------|----------------|---------------|----------------|----------------|----------------|
| A group           | 71.60 ±<br>13.73 | 2.9 ±<br>12.14   | -3.7 ±<br>15.97  | -6.9 ±<br>11.82  | -8.47 ± 14.8   | -7.3 ± 13.61  | -8.27 ± 15.95  | -6.87 ± 13.28  | -3.4 ± 14.82   |
| B group           | 80.47 ±<br>13.53 | -3.7 ±<br>16.6   | -6.67 ±<br>13.42 | -12.4 ±<br>12.53 | -11.97 ± 12.54 | -13.23 ± 11   | -12.37 ± 11.77 | -14 ± 12.06    | -9.5 ± 14.87   |
| C group           | 73.74 ±<br>11.58 | 2.81 ±<br>10.91  | -0.03 ±<br>11.01 | -3.71 ±<br>7.87  | -3.77 ± 8.79   | -2.58 ± 10.15 | -3.03 ± 10.55  | -3.06 ± 10.45  | -0.68 ± 10.11  |
| MBP,<br>mmHg      |                  |                  |                  |                  |                |               |                |                |                |
|                   | <0.001*          |                  |                  |                  |                |               |                |                |                |
| A group           | 88.73 ±<br>10.85 | 2.13 ±<br>10.61  | -3.47 ±<br>12.66 | -6.37 ±<br>9.47  | -7.13 ± 11.76  | -5.53 ± 11.36 | -7.17 ± 12.84  | -5.83 ± 10.47  | -3.37 ± 11.2   |
| B group           | 99.63 ±<br>11.91 | -7.07 ±<br>12.95 | -9.9 ±<br>11.11  | -15.1 ±<br>10.89 | -14.63 ± 10.57 | -15.53 ± 9.55 | -14.77 ± 10.53 | -16.67 ± 10.89 | -13.03 ± 12.81 |
| C group           | 93.29 ±<br>11.53 | 0.71 ±<br>7.65   | -1.68 ±<br>10.79 | -5.52 ±<br>8.05  | -5.35 ± 8.88   | -4.39 ± 9.79  | -5.1 ± 8.81    | -4.74 ± 9.74   | -2 ± 9.54      |
| HR,<br>beats/min. |                  |                  |                  |                  |                |               |                |                |                |
|                   | 0.263            |                  |                  |                  |                |               |                |                |                |
| A group           | 75.8 ± 12.84     | 1.6 ±<br>8.24    | -0.33 ±<br>6.61  | -3.27 ±<br>7.53  | -2.67 ± 9.65   | -3.5 ± 9.24   | -4.07 ± 9.49   | -1.4 ± 9.23    | -1.67 ± 8.13   |
| B group           | 80.73 ±<br>14.78 | -0.8 ±<br>7.8    | -2.2 ± 7.26      | -4.5 ± 7.42      | -4.57 ± 7.47   | -5.33 ± 7.15  | -5.43 ± 7.99   | -3.57 ± 8.64   | -0.03 ± 10.37  |
| C group           | 76.74 ±<br>12.15 | 4.26 ±<br>9.65   | 0.71 ±<br>8.39   | -1.19 ±<br>7.25  | -2.13 ± 8.11   | -0.74 ± 8.21  | -2.9 ± 8.62    | -4.71 ± 10.03  | -1.26 ± 8.69   |
| GLU,              |                  |                  |                  |                  |                |               |                |                |                |
|                   | 0.452            |                  |                  |                  |                |               |                |                |                |

mmol/L

|         |             |             |             |             |             |             |             |             |             |
|---------|-------------|-------------|-------------|-------------|-------------|-------------|-------------|-------------|-------------|
| A group | 8.67 ± 3.56 | 0.42 ± 1.02 | 1.26 ± 1.64 | 1.86 ± 2.27 | 2.3 ± 2.38  | 2.42 ± 2.63 | 2.39 ± 2.99 | 2.24 ± 2.97 | 1.9 ± 3.16  |
| B group | 7.66 ± 3.14 | 0.61 ± 1.08 | 1.57 ± 1.92 | 2.09 ± 2.36 | 2.24 ± 2.72 | 2.33 ± 3.12 | 2.18 ± 3.42 | 1.84 ± 3.27 | 1.95 ± 3.37 |
| C group | 8.84 ± 3.36 | 0.24 ± 0.95 | 0.85 ± 1.82 | 1.34 ± 1.95 | 1.45 ± 2.28 | 1.73 ± 2.6  | 1.53 ± 2.91 | 1.19 ± 3.23 | 1.25 ± 3.54 |

---

Data were presented as mean±SD for each group.



**Table S2.** Post-treatment measurements in blood pressure, SDs and CVs of blood pressure and heart rate at 2 h postprandial.

| Post-treatment measurements         | A group<br>(n=30) | B group<br>(n=30)          | C group<br>(n=31)          | <i>p</i> -value |
|-------------------------------------|-------------------|----------------------------|----------------------------|-----------------|
| Lowest value <sup>a</sup> , mmHg    |                   |                            |                            |                 |
| SBP                                 | 110.67 ± 10.69    | 106.03 ± 14.92             | 115 ± 15.09                | 0.043*          |
| DBP                                 | 57.2 ± 8.21       | 59 ± 11.97                 | 63.45 ± 11.15              | 0.064           |
| MBP                                 | 75.5 ± 6.37       | 75.27 ± 12.61              | 81.26 ± 10.9               | 0.041*          |
| Max fall value <sup>a</sup> , mmHg  |                   |                            |                            |                 |
| SBP                                 | 13.8 ± 6.65       | 32.83 ± 9.58 <sup>†</sup>  | 18.68 ± 11.89 <sup>†</sup> | <.001*          |
| DBP <sup>b</sup>                    | 14.5 ± 13.17      | 21.47 ± 10.77 <sup>†</sup> | 10.55 ± 6.84 <sup>‡</sup>  | <.001*          |
| MBP <sup>b</sup>                    | 13.4 ± 9.72       | 24.37 ± 9.26 <sup>†</sup>  | 12.06 ± 6.95 <sup>‡</sup>  | <.001*          |
| Time of max fall <sup>a</sup> , min |                   |                            |                            |                 |
| SBP                                 | 69.5 ± 36.42      | 64.5 ± 36.35               | 65.32 ± 35.4               | 0.847           |
| DBP <sup>b</sup>                    | 72.5 ± 26.74      | 66 ± 32.39                 | 76.55 ± 27.7               | 0.457           |

|                                             |              |                            |                              |        |
|---------------------------------------------|--------------|----------------------------|------------------------------|--------|
| MBP <sup>b</sup>                            | 75.5 ± 28.54 | 73 ± 31.69                 | 65.65 ± 32.53                | 0.427  |
| Duration of fall >20mmHg <sup>b</sup> , min |              |                            |                              |        |
| SBP                                         | 1 ± 5.48     | 52.33 ± 36.17 <sup>†</sup> | 19.35 ± 25.16 <sup>†,‡</sup> | <.001* |
| DBP                                         | 8.5 ± 23.53  | 24.31 ± 34.81 <sup>†</sup> | 3.87 ± 15.48 <sup>‡</sup>    | <.001* |
| MBP                                         | 7 ± 23.22    | 27.03 ± 30.58 <sup>†</sup> | 5.32 ± 15.76 <sup>‡</sup>    | <.001* |
| SD value <sup>b</sup>                       |              |                            |                              |        |
| SBP                                         | 7.36 ± 2.16  | 11.07 ± 2.99 <sup>†</sup>  | 9 ± 3.39 <sup>†,‡</sup>      | <.001* |
| DBP                                         | 7.8 ± 4.23   | 9.38 ± 4.61 <sup>†</sup>   | 6.84 ± 3.77 <sup>‡</sup>     | 0.033* |
| MBP                                         | 6.88 ± 2.96  | 9.21 ± 3.54 <sup>†</sup>   | 6.47 ± 2.98 <sup>‡</sup>     | 0.002* |
| HR                                          | 5.64 ± 2.24  | 6.98 ± 2.39                | 5.68 ± 1.85                  | 0.029* |
| CV value <sup>b</sup>                       |              |                            |                              |        |
| SBP                                         | 0.06 ± 0.01  | 0.09 ± 0.03 <sup>†</sup>   | 0.07 ± 0.03 <sup>†,‡</sup>   | <.001* |
| DBP                                         | 0.12 ± 0.06  | 0.14 ± 0.07                | 0.1 ± 0.06                   | 0.053  |
| MBP                                         | 0.08 ± 0.03  | 0.11 ± 0.04 <sup>†</sup>   | 0.07 ± 0.04 <sup>†,‡</sup>   | 0.003* |
| Heart rate                                  | 0.08 ± 0.03  | 0.09 ± 0.04                | 0.08 ± 0.03                  | 0.159  |

---

Data were presented as mean±SD by group.

<sup>ab</sup> Differences among groups were compared using one-way ANOVA with a post-hoc comparison, Bonferroni test for <sup>a</sup>data with normal distribution and Kruskal-Wallis test with a post-hoc pair-wise comparison, Mann-Whitney U test for <sup>b</sup>data without normal distribution.

\*  $p < 0.05$ , significantly different among three groups.

<sup>†,‡</sup>  $p < 0.0167$ , significantly different as compared with groups <sup>†</sup>A and <sup>‡</sup>B.



Abbreviations: SBP, systolic blood pressure; DBP, diastolic blood pressure; SD, standard deviation;

CV, coefficient of variation 2

**Table S3.** Comparison of HRV data among three groups.

| HRV parameters       | A group<br>(n=29) | B group<br>(n=30) | C group<br>(n=31) | p-value |
|----------------------|-------------------|-------------------|-------------------|---------|
| mean NN <sup>a</sup> | 811.24 ± 94.42    | 790.5 ± 126.31    | 802.06 ± 128.02   | 0.795   |
| SDNN <sup>a</sup>    | 63.52 ± 21.73     | 67.13 ± 29.76     | 65.74 ± 25.25     | 0.864   |
| SDANN <sup>a</sup>   | 50.34 ± 18.85     | 51.8 ± 25.44      | 49.29 ± 21.01     | 0.905   |
| ASDNN <sup>a</sup>   | 35.07 ± 13.04     | 36.7 ± 17.66      | 39.42 ± 16.77     | 0.568   |
| rMSSD                | 18.93 ± 7.67      | 19.57 ± 9.54      | 21.61 ± 11.85     | 0.813   |
| pNN50                | 2.63 ± 3.67       | 3.59 ± 5.39       | 4.55 ± 7.31       | 0.826   |
| BB50                 | 231.79 ± 302.99   | 312.73 ± 455.26   | 370.87 ± 506.29   | 0.714   |
| VLF <sup>a</sup>     | 19.58 ± 8.16      | 20.96 ± 10.01     | 21.5 ± 8.86       | 0.701   |
| LF                   | 11.28 ± 5.34      | 12.35 ± 6.94      | 13.64 ± 11.72     | 0.679   |
| HF                   | 7.83 ± 3.34       | 8.04 ± 4.46       | 139.7 ± 732.6     | 0.925   |
| LF/HF <sup>a</sup>   | 1.47 ± 0.45       | 1.57 ± 0.48       | 1.56 ± 0.49       | 0.645   |

Data were represented as mean±SD by group.

<sup>a</sup>Difference among groups were compared using one-way ANOVA test with a post-hoc comparison, Bonferroni test for <sup>a</sup>data with normal distribution; and Kruskal-Wallis test with a post-hoc pair-wise comparison, Mann-Whitney U test for other data because of data without normal distribution.

**Table S4.** Continuous glucose monitoring system measurements by group.

|                            | A group<br>(n=30) | B group<br>(n=30) | C group<br>(n=31) | <i>p</i> -value |
|----------------------------|-------------------|-------------------|-------------------|-----------------|
| Correlation<br>Coefficient | $0.9 \pm 0.2$     | $0.91 \pm 0.08$   | $0.9 \pm 0.11$    | 0.922           |

|                                          |               |               |               |        |
|------------------------------------------|---------------|---------------|---------------|--------|
| MBG, mmol/L                              | 9.66 ± 2.24   | 8.92 ± 1.83   | 9.33 ± 1.57   | 0.317  |
| SD, mmol/L                               | 2.21 ± 0.77   | 2.15 ± 0.91   | 2.2 ± 1.13    | 0.818  |
| Bgdiff, mmol/L                           | 8.57 ± 2.59   | 9.01 ± 3.32   | 8.82 ± 4.56   | 0.899  |
| T <sub>BG</sub> >7.8 mmol/L, %           | 71.78 ± 25.62 | 58.97 ± 27.94 | 65.52 ± 22.39 | 0.169  |
| T <sub>BG</sub> >11.1 mmol/L, %          | 28.52 ± 24.8  | 24 ± 24.48    | 23.1 ± 23.27  | 0.551  |
| Hyperglycemia<br>AUC>7.8mmol/Lday        | 2.33 ± 1.76   | 1.65 ± 1.38   | 1.94 ± 1.39   | 0.259  |
| Hyperglycemia<br>AUC>11.1<br>mmol/Lday   | 0.7 ± 1.02    | 0.52 ± 0.68   | 0.53 ± 0.69   | 0.668  |
| MAGE, mmol/L                             | 4.27 ± 1.7    | 4.35 ± 1.63   | 4.39 ± 2.26   | 0.926  |
| NGE, time/d                              | 4.78 ± 2.38   | 4.7 ± 2.1     | 4.42 ± 3.06   | 0.368  |
| MBG <sup>1</sup> , mmol/L                | 9.38 ± 3.18   | 8.64 ± 3.39   | 8.97 ± 3.52   | 0.446  |
| MBG <sup>2</sup> , mmol/L                | 10.46 ± 3.53  | 9.21 ± 2.4    | 9.95 ± 2.71   | 0.362  |
| BG <sub>diff</sub> <sup>1</sup> , mmol/L | 3.47 ± 1.68   | 3.34 ± 2.25   | 2.49 ± 2.09†  | 0.042* |
| BG <sub>diff</sub> <sup>2</sup> , mmol/L | 4.83 ± 2.67   | 4.77 ± 2.81   | 2.89 ± 1.42†‡ | 0.003* |
| Max PBG, mmol/L                          | 11.78 ± 3.83  | 10.91 ± 2.95  | 11.52 ± 3.32  | 0.715  |

|                |               |               |                              |        |
|----------------|---------------|---------------|------------------------------|--------|
| Peak Time, min | 61.11 ± 25.79 | 68.07 ± 32.46 | 104.43 ± 20.55 <sup>†‡</sup> | <.001* |
| SD2            | 1.28 ± 0.69   | 1.31 ± 0.87   | 1.16 ± 0.89                  | 0.542  |
| CV2            | 0.13 ± 0.07   | 0.14 ± 0.09   | 0.11 ± 0.07                  | 0.309  |

---

Data were presented as mean±standard deviations for each group.

<sup>1,2</sup> at 2 hour <sup>1</sup>before and <sup>2</sup>after the meal, respectively.

<sup>ab</sup>Differences among groups were compared using Kruskal-Wallis test for <sup>a</sup>continuous variables without normal distribution; one-way ANOVA with a post-hoc pair-wise comparisons, Bonferroni test for <sup>b</sup>continuous variables with normal distribution.

\*  $p < 0.05$ , significantly different among the three groups.

<sup>†,‡</sup>  $p < 0.0167$ , significantly different as compared with groups <sup>†</sup>A and <sup>‡</sup>B.

Abbreviations: MBG, mean blood glucose; SD, standard deviation; T<sub>BG</sub>, the proportion of times at which the blood glucose was higher than set levels over 24 h; AUC, area under the curve; MAGE, mean amplitude of glucose excursion; NGE, number of glucose excursions; BG<sub>diff</sub>, difference between maximum and minimum blood glucose concentrations; PBG, postprandial blood glucose.
